# Supplementary material
Source: Research Square preprint supplement (doi:10.21203/rs.3.rs-9304477/v1)
Supplement: Supplementary file 1 [file 0ac90fe72577d7fb534b018a.pdf]

**A**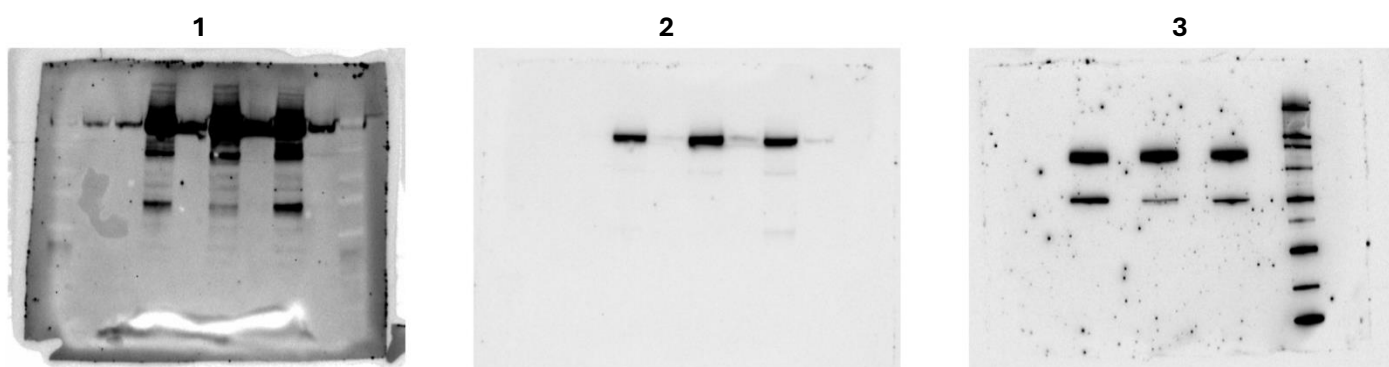**B****Males: HSP60**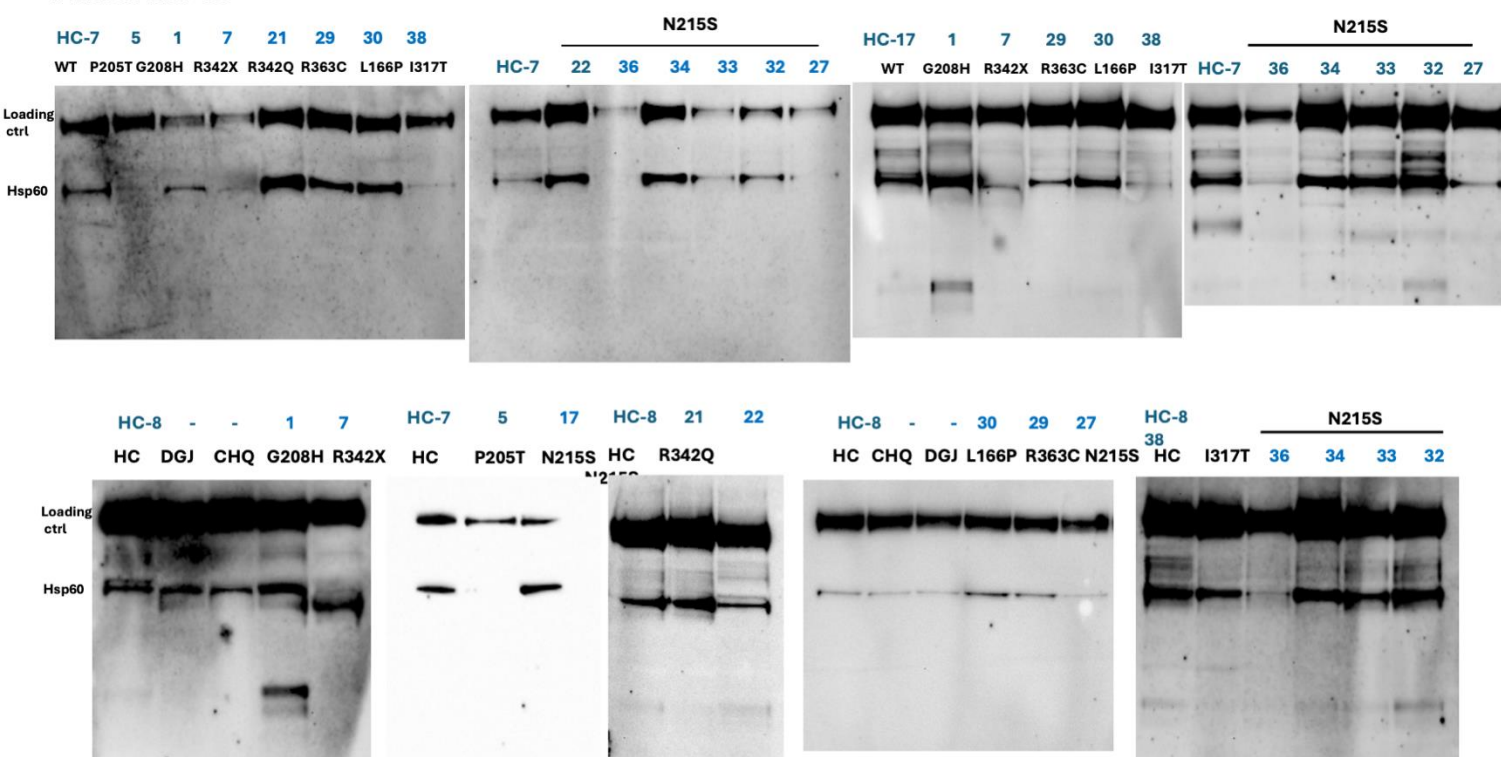**C****Females: HSP60**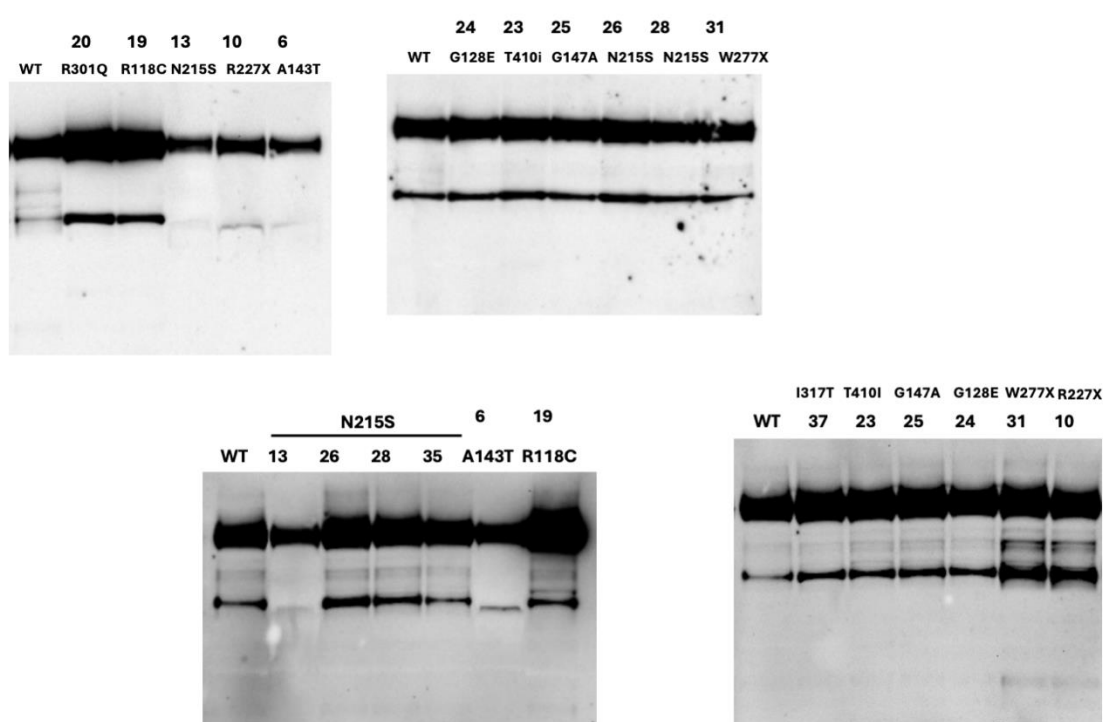

**Supplementary file: uncropped western blots. (A)** Fibroblasts experiments showing: 1. Hsp10 blot, 2. loading control (Na/K ATPase) blot, and 3. Blot for both, Hsp60 and loading control. **(B)** Full uncropped Hsp60 blots for male patients with corresponding Na/K ATPase loading controls. **(C)** Full uncropped Hsp60 blots for females with corresponding NA/K ATPase loading controls.
