# Supplementary material
Source: Research Square preprint supplement (doi:10.21203/rs.3.rs-9304477/v1)
Supplement: Supplementary file 2 [file f9fff8428e38e82401f08a0d.pdf]

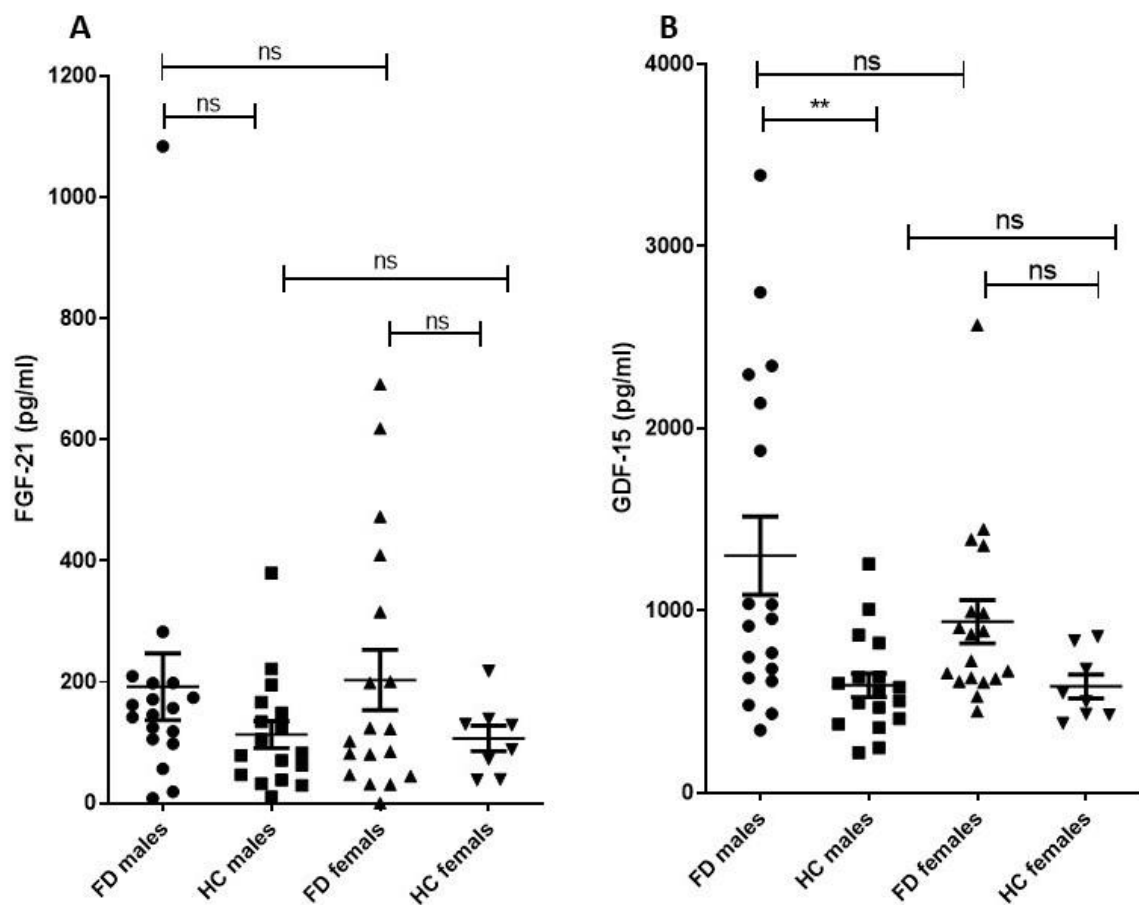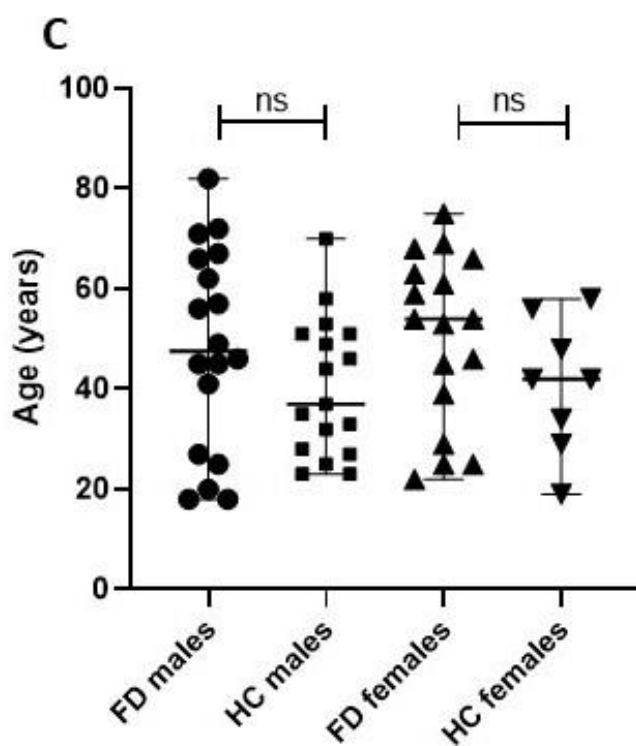

|                    | Males                |                      | Females              |                       |
|--------------------|----------------------|----------------------|----------------------|-----------------------|
|                    | FD                   | HC                   | FD                   | HC                    |
| Number of subjects | 18                   | 17                   | 17                   | 8                     |
| Age range (years)  |                      |                      |                      |                       |
| Mean (SD)          | 48.2 (20.2)          | 40.3 (13.8)          | 50.2 (17)            | 41 (13.3)             |
| Median (range)     | 47.5 (18 - 82)       | 37 (23 - 70)         | 54 (22 - 75)         | 42 (19 - 58)          |
| FGF21 (pg/ml)      |                      |                      |                      |                       |
| Mean (SD)          | 192.1 (232.6)        | 113.3 (91.8)         | 203.2 (210.8)        | 106.9 (60)            |
| Median (range)     | 151.6 (8.1 - 1084)   | 83.1 (10.1 - 379.7)  | 112.4 (0.38 - 691.4) | 108.7 (38.4 - 218.1)  |
| GDF15 (pg/ml)      |                      |                      |                      |                       |
| Mean (SD)          | 1301 (914.6)         | 589.9 (270.7)        | 938.7 (504.5)        | 582.8 (186.1)         |
| Median (range)     | 934.9 (342.6 - 3389) | 559.3 (219.4 - 1255) | 795.9 (447 - 2568)   | 525.4 (381.2 - 856.9) |
